# Supplementary material for: p53 terminates the regenerative fetal-like state after colitis-associated injury
Source: PubMed Central journal article supplement — Sci Adv. 2024 Oct 25;10(43):eadp8783. doi: 10.1126/sciadv.adp8783 (PMC11506124; doi:10.1126/sciadv.adp8783), 2024-10-25
Supplement: sciadv.adp8783_sm.pdf [file sciadv.adp8783_sm.pdf]

Supplementary Materials for  
**p53 terminates the regenerative fetal-like state after colitis-associated injury**

Kimberly Hartl *et al.*

Corresponding author: Michael Sigal, michael.sigal@charite.de

*Sci. Adv.* **10**, eadp8783 (2024)  
DOI: 10.1126/sciadv.adp8783

**The PDF file includes:**

Figs. S1 to S6  
Tables S1 to S3  
Legend for data S1

**Other Supplementary Material for this manuscript includes the following:**

Data S1

Fig. S1: Epithelial injury transiently induces Wnt-boost, regenerative signaling and loss of differentiation

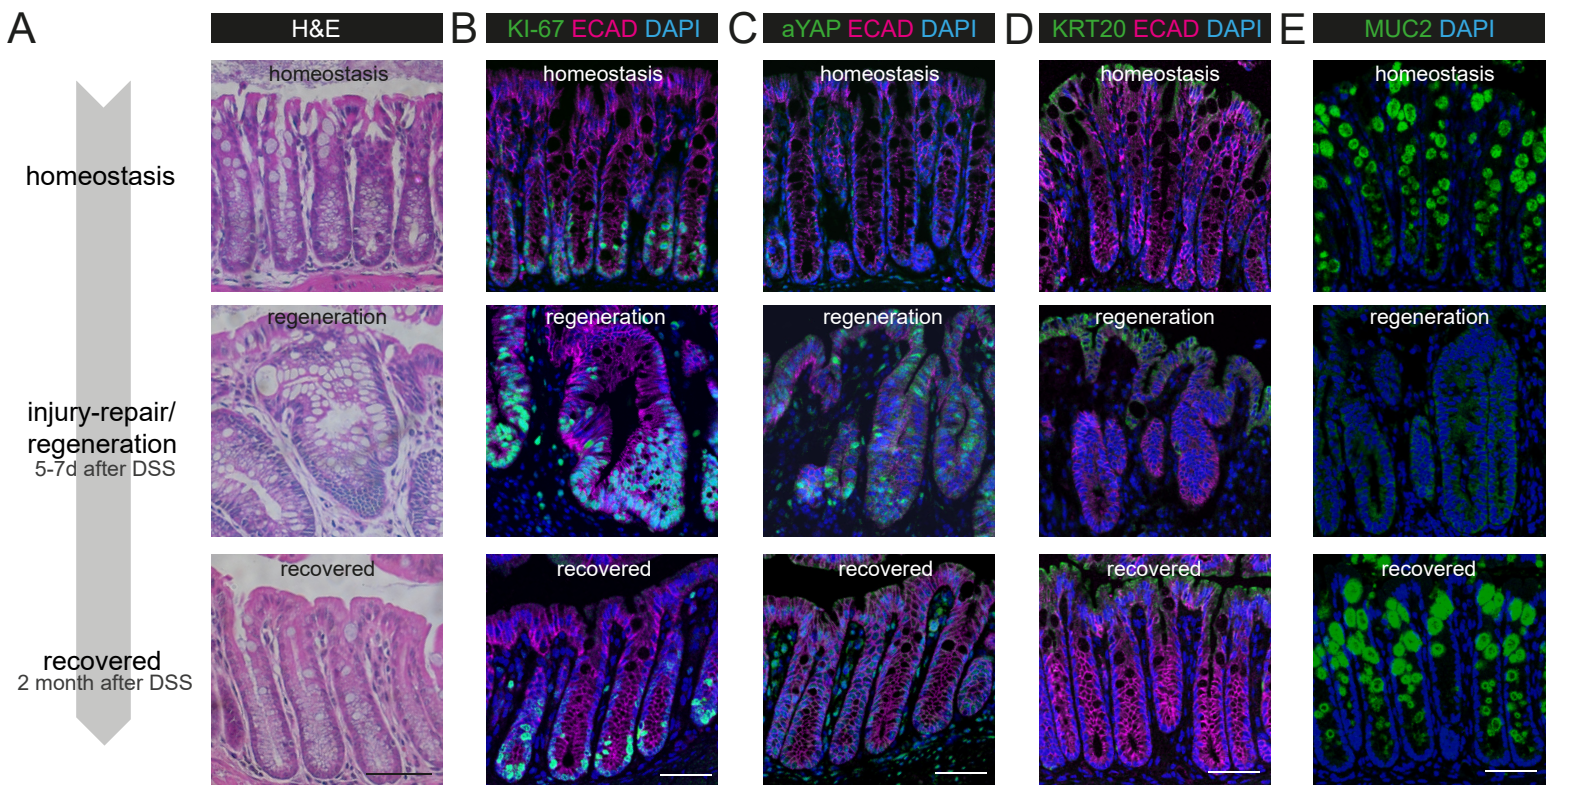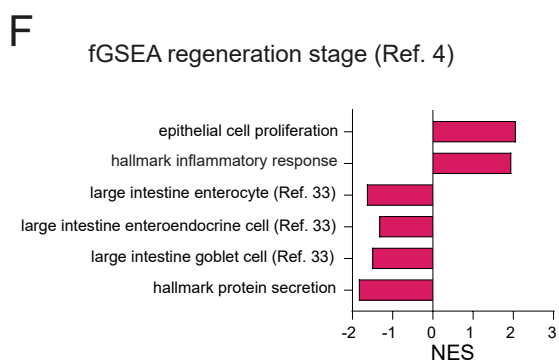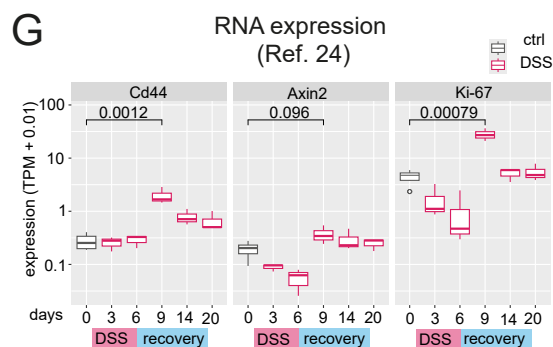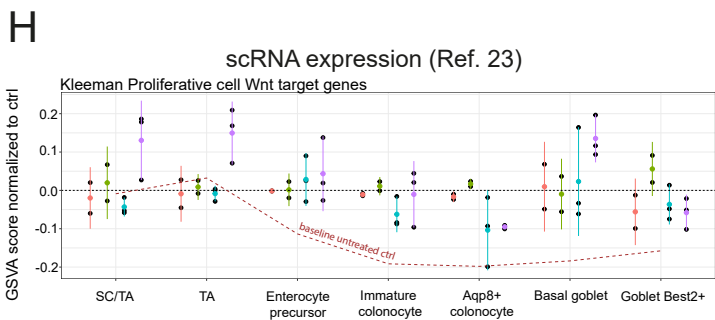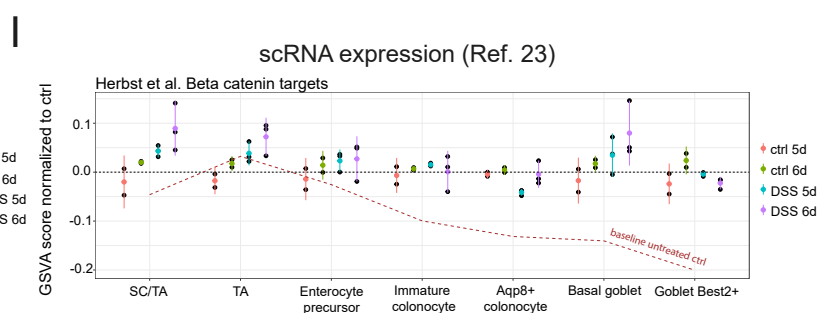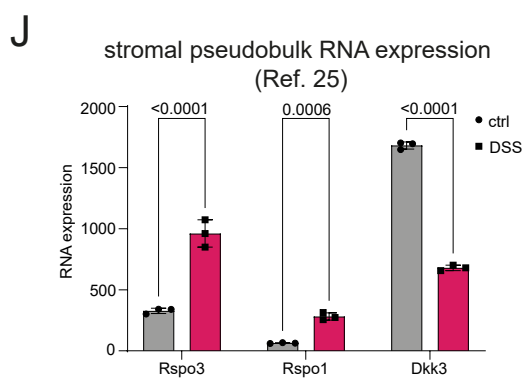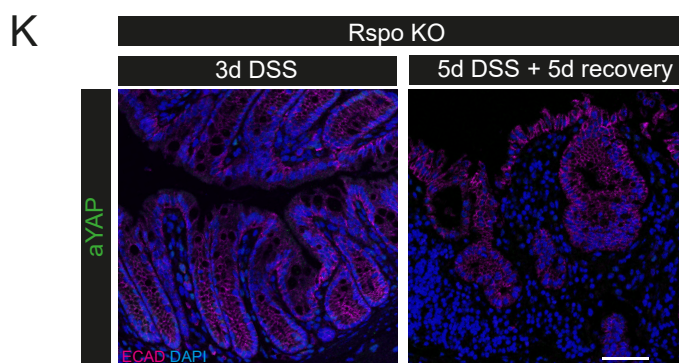

### Supplementary Figure 1: Epithelial injury transiently induces Wnt boost, regenerative signaling and loss of differentiation

**A** Schematic of DSS-induced colitis and H&E staining for homeostasis, regeneration and recovered colonic epithelium. n = 5 mice for homeostasis, n = 6 mice for regeneration, n = 3 mice for 2-month recovery. **B-E** IF staining for KI-67, active YAP (aYAP), KRT20 or MUC2 (green) counterstained for E-cadherin (magenta) and DAPI (blue). n = 5 mice for homeostasis, n = 6 mice for regeneration, n = 3 mice for 2-month recovery. **F** Normalized enrichment scores (NES) from gene set enrichment analysis (GSEA) for MSigDB gene sets for DSS-colitis data from (4). **G** RNA expression for Cd44, Axin2 and Ki-67 of a DSS time-course experiment (24). **H+I** scRNA Seq expression data for Wnt and  $\beta$ -catenin target gene sets from epithelial cells at different time points in DSS colitis compared to untreated controls derived from published data (23). Brown dashed lines: Baseline of untreated controls. Scores are normalized by subtracting the average level in untreated condition samples. **J** Pseudobulk RNA expression of Rspo3, Rspo1 and Dkk3 in stromal cells from published data (25). **K** IF staining for aYAP (green) in *Myh11Cre<sup>ERT2</sup>* x *Rspo* flox/flox mice treated with DSS for 3 days (n = 3 mice) or 5 days with 5 days of recovery (n = 6 mice). Scale bars: 50 $\mu$ m.

Fig. S2: Loss of *Trp53* does not alter gross tissue morphology in homeostasis

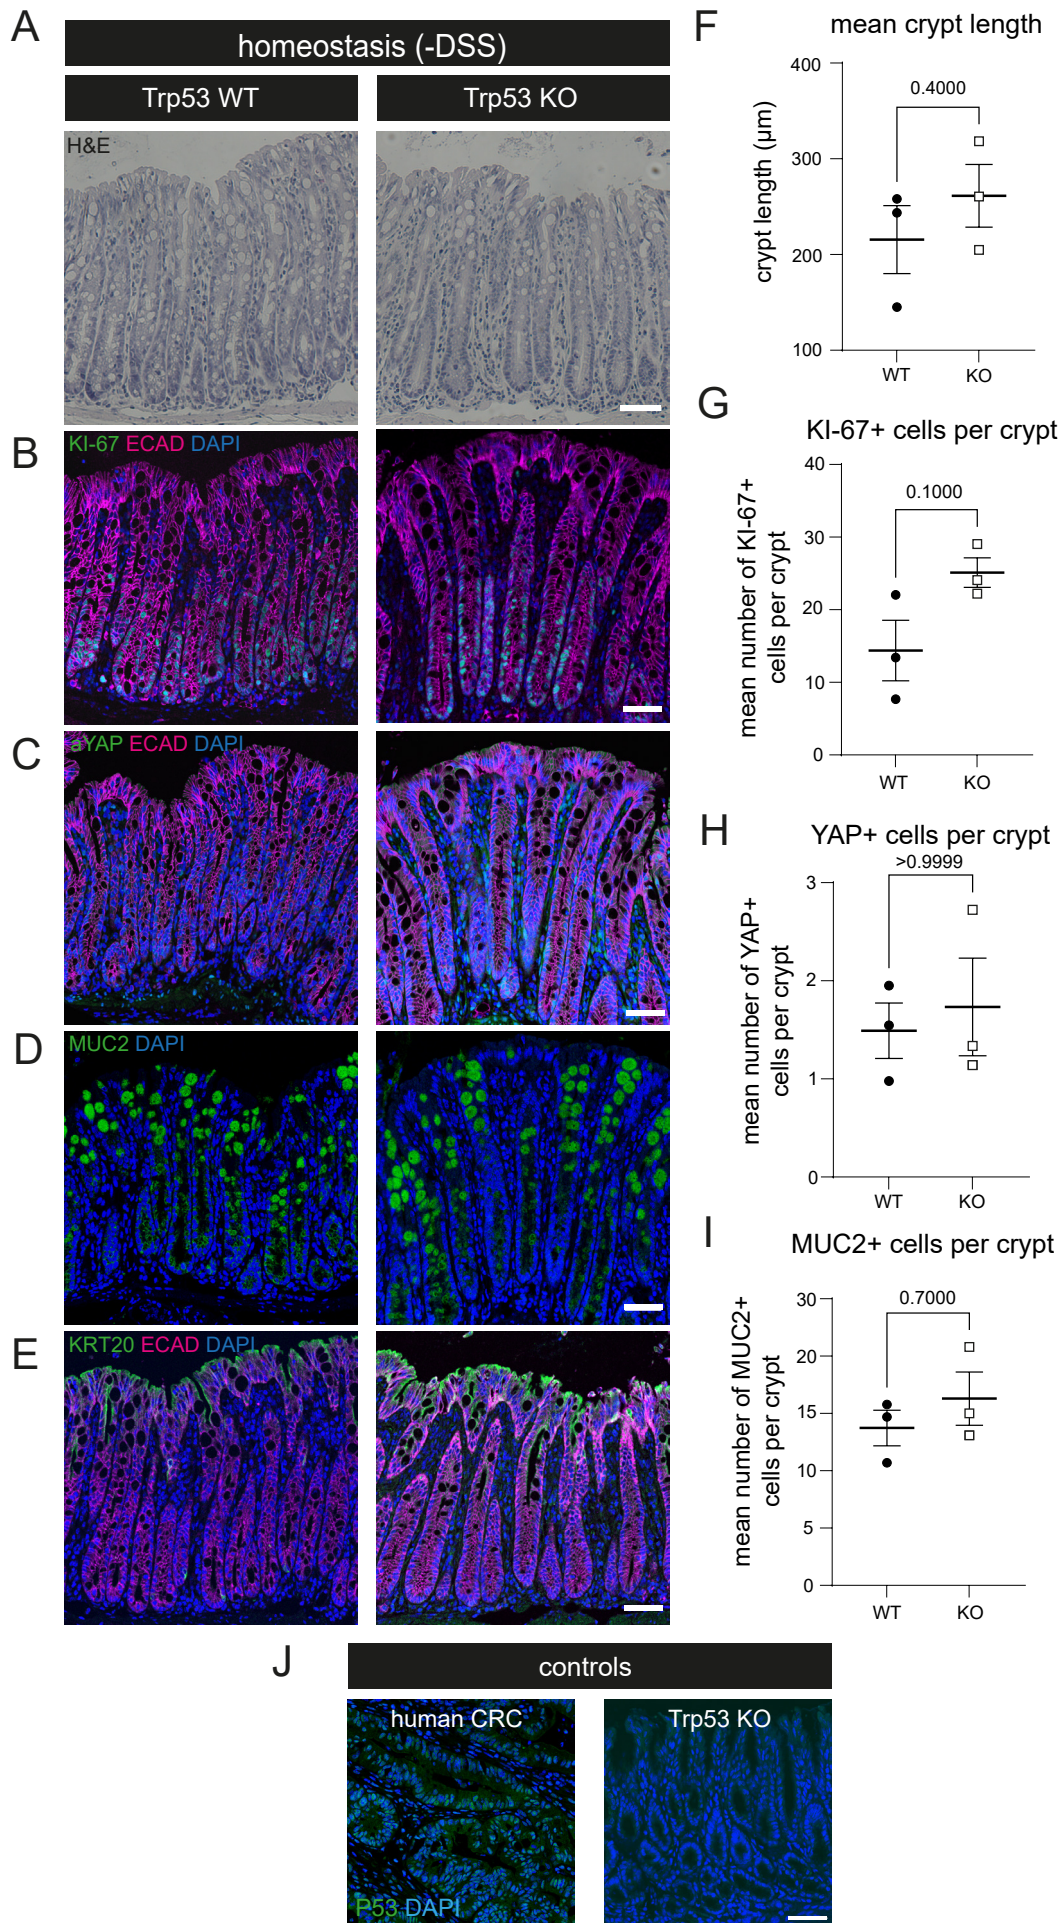

**Supplementary Figure 2: Loss of *Trp53* does not alter gross tissue morphology in homeostasis**

**A** Representative H&E image of colon of *Trp53* WT and KO mice. n = 3 mice. **B-E** Representative IF staining of *Trp53* WT and KO colon for either KI-67,  $\alpha$ YAP, MUC2 or KRT20 (all green) counterstained for E-cadherin (magenta) and DAPI (blue). n = 3 mice. **F** Mean of crypt length measurement of *Trp53* WT and KO mice. n = 3 mice. **G** Quantification of B. n = 3 mice. **H** Quantification of C. n = 3 mice. **I** Quantification of D. n = 3 mice. **J** IF control staining for p53 on human colorectal carcinoma (CRC) and *Trp53* KO murine colon. Scale bars: 50  $\mu$ m.

Fig. S3: Loss of *Trp53* locks the colonic epithelium in a regenerative, inflammatory, high Wnt state

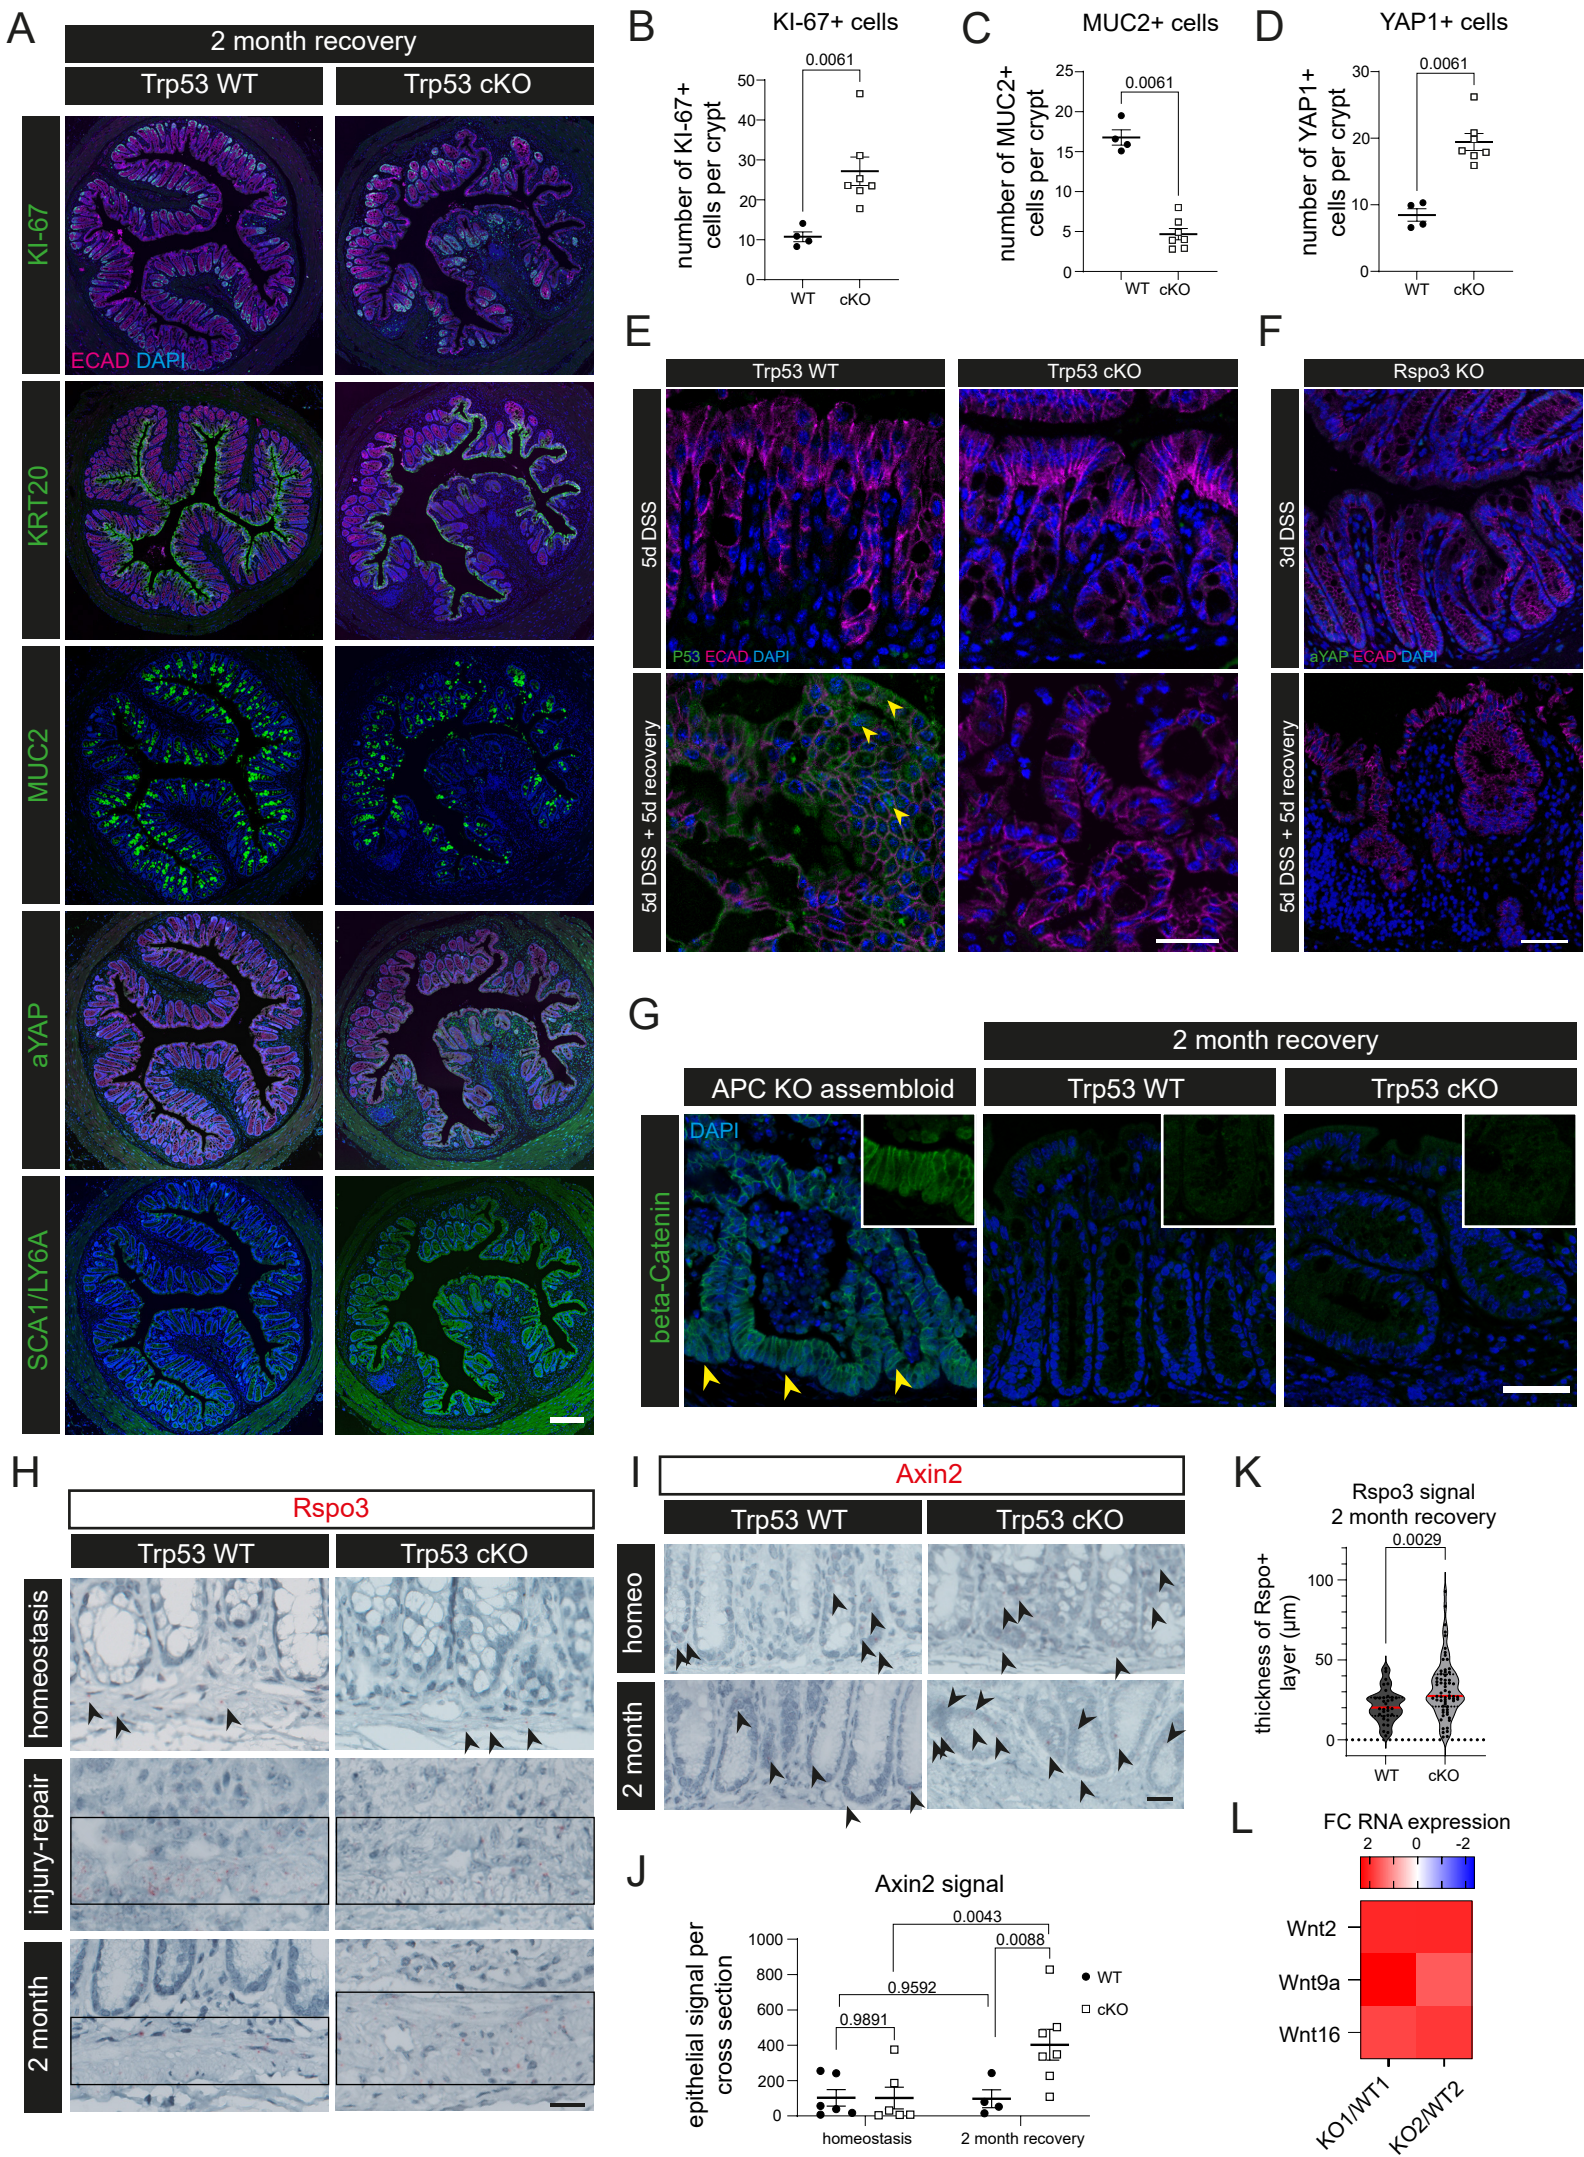

**Supplementary Figure 3: Loss of *Trp53* locks the colonic epithelium in a regenerative, high Wnt state**

**A** Overview images of colonic cross sections IF-stained for KI-67, KRT20, MUC2,  $\alpha$ YAP or SCA1/LY6A (all green), E-Cadherin (magenta) and DAPI (blue) of *Trp53* WT and cKO mice 2 months after DSS treatment. Scale bar: 200  $\mu$ m. WT n = 2 mice, cKO n = 3 mice. **B-D** Quantification for Fig. 2G (n = 2 mice for WT, n = 3 mice for cKO; data points represent quantification from different colon cross-sections). **E** Single molecule RNA in-situ hybridization images for *Rspo3* in *Trp53* WT and cKO mice during homeostasis, injury repair and 2 months recovery. WT n = 2 mice, cKO n = 2-3 mice. Scale bar: 20 $\mu$ m. **F** Quantification of E for 2 months recovery time point. Dots represent measurements at different sites per colon cross section. **G** Single molecule RNA in-situ hybridization images for *Axin2* in *Trp53* WT and cKO mice during homeostasis and 2 months recovery. WT n = 2 mice, cKO n = 2-3 mice. Scale bar: 20 $\mu$ m. **H** Quantification of H for homeostasis and 2 months recovery time point. Data points represent quantification of different colon cross sections **I** IF stainings for  $\beta$ -catenin (green) in APC KO assembloids, *Trp53* WT and cKO mice at 2 months recovery time points counterstained for DAPI (blue). APC KO assembloids n = 2, WT n = 2 mice, cKO n = 3 mice. Scale bar: 50 $\mu$ m. **J** IF stainings for P53 (green) in *Trp53* WT and cKO mice at 5d DSS and 5d DSS with 5d recovery counterstained for E-cadherin (magenta) and DAPI (blue). WT n = 2 mice, cKO n = 2 mice. Scale bar: 50 $\mu$ m.

Fig. S4: sWnt induces regeneration and p53 signaling, but WT and *Trp53* KO organoids grow at the same rate in regeneration medium

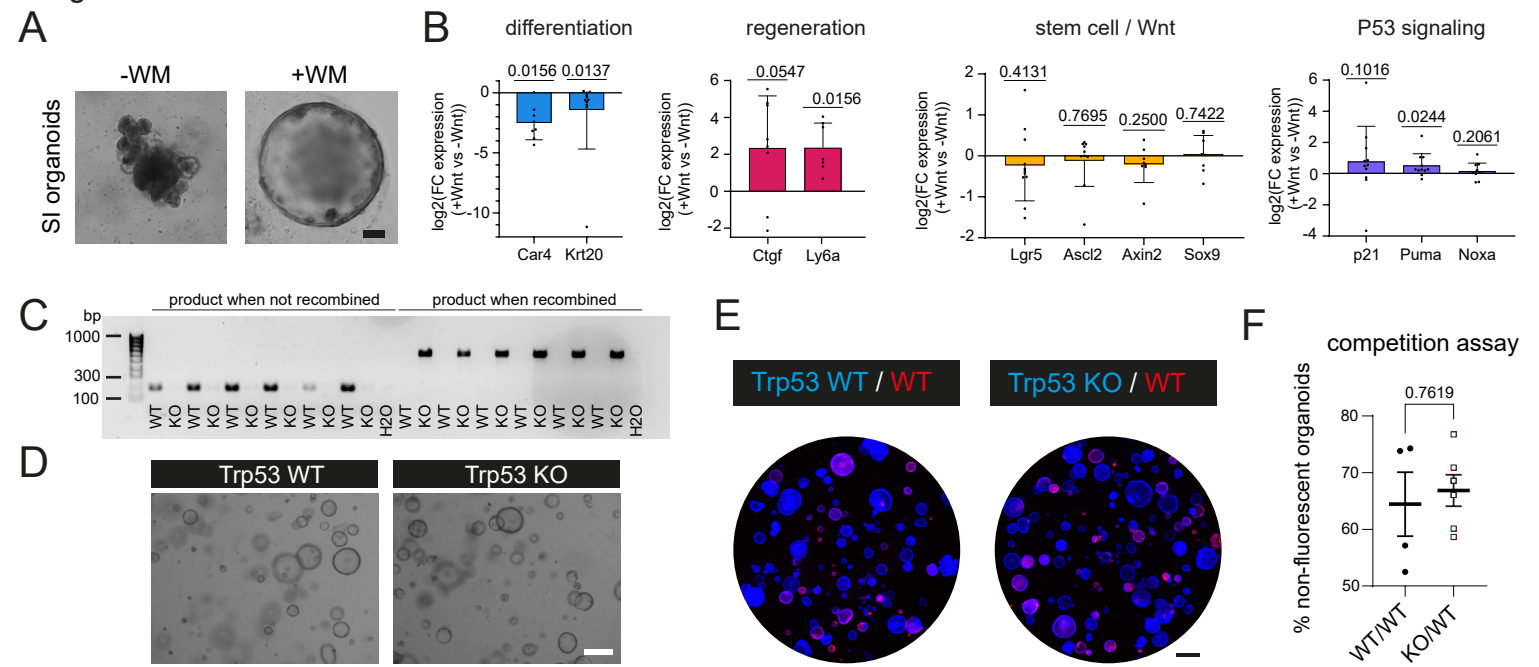



**Supplementary Figure 4: sWnt induces regeneration and WT and *Trp53* KO organoids grow at the same rate in regeneration medium**

**A** Representative BF images of small intestinal (SI) organoids grown in medium without (-WM) or with (+WM) supplementation of Wnt-activating growth factors. Scale bar: 100  $\mu$ m. n = 11 experimental replicates from 6 biological replicates. **B** logFC of mRNA expression of SI organoids in +WM vs -WM culture condition for differentiation, regeneration and stem cell/Wnt signaling markers and p53 signaling. n = 8-11 experimental replicates from 6 biological replicates. **C** DNA gel of genotyping PCR for WT and KO colon organoids. **D** Representative BF overview images of *Trp53* WT and KO organoid culture from n > 10 biological replicates. Scale bar: 300  $\mu$ m. **E** Representative IF whole-mount images of *Trp53* WT and KO organoids grown in co-culture with fluorescent (red) WT organoids (n = 2 biological replicates for WT, n = 3 biological replicates for KO). All organoids were counterstained with DAPI. Scale bar: 500  $\mu$ m. **F** Quantification of E (n = 2 biological replicates for WT, n = 3 biological replicates for KO). Plotted as mean +/- s.e.m., data points represent technical replicates.

Fig. S5: Regenerative *Trp53* KO organoids exhibit accelerated growth kinetics and lack differentiation

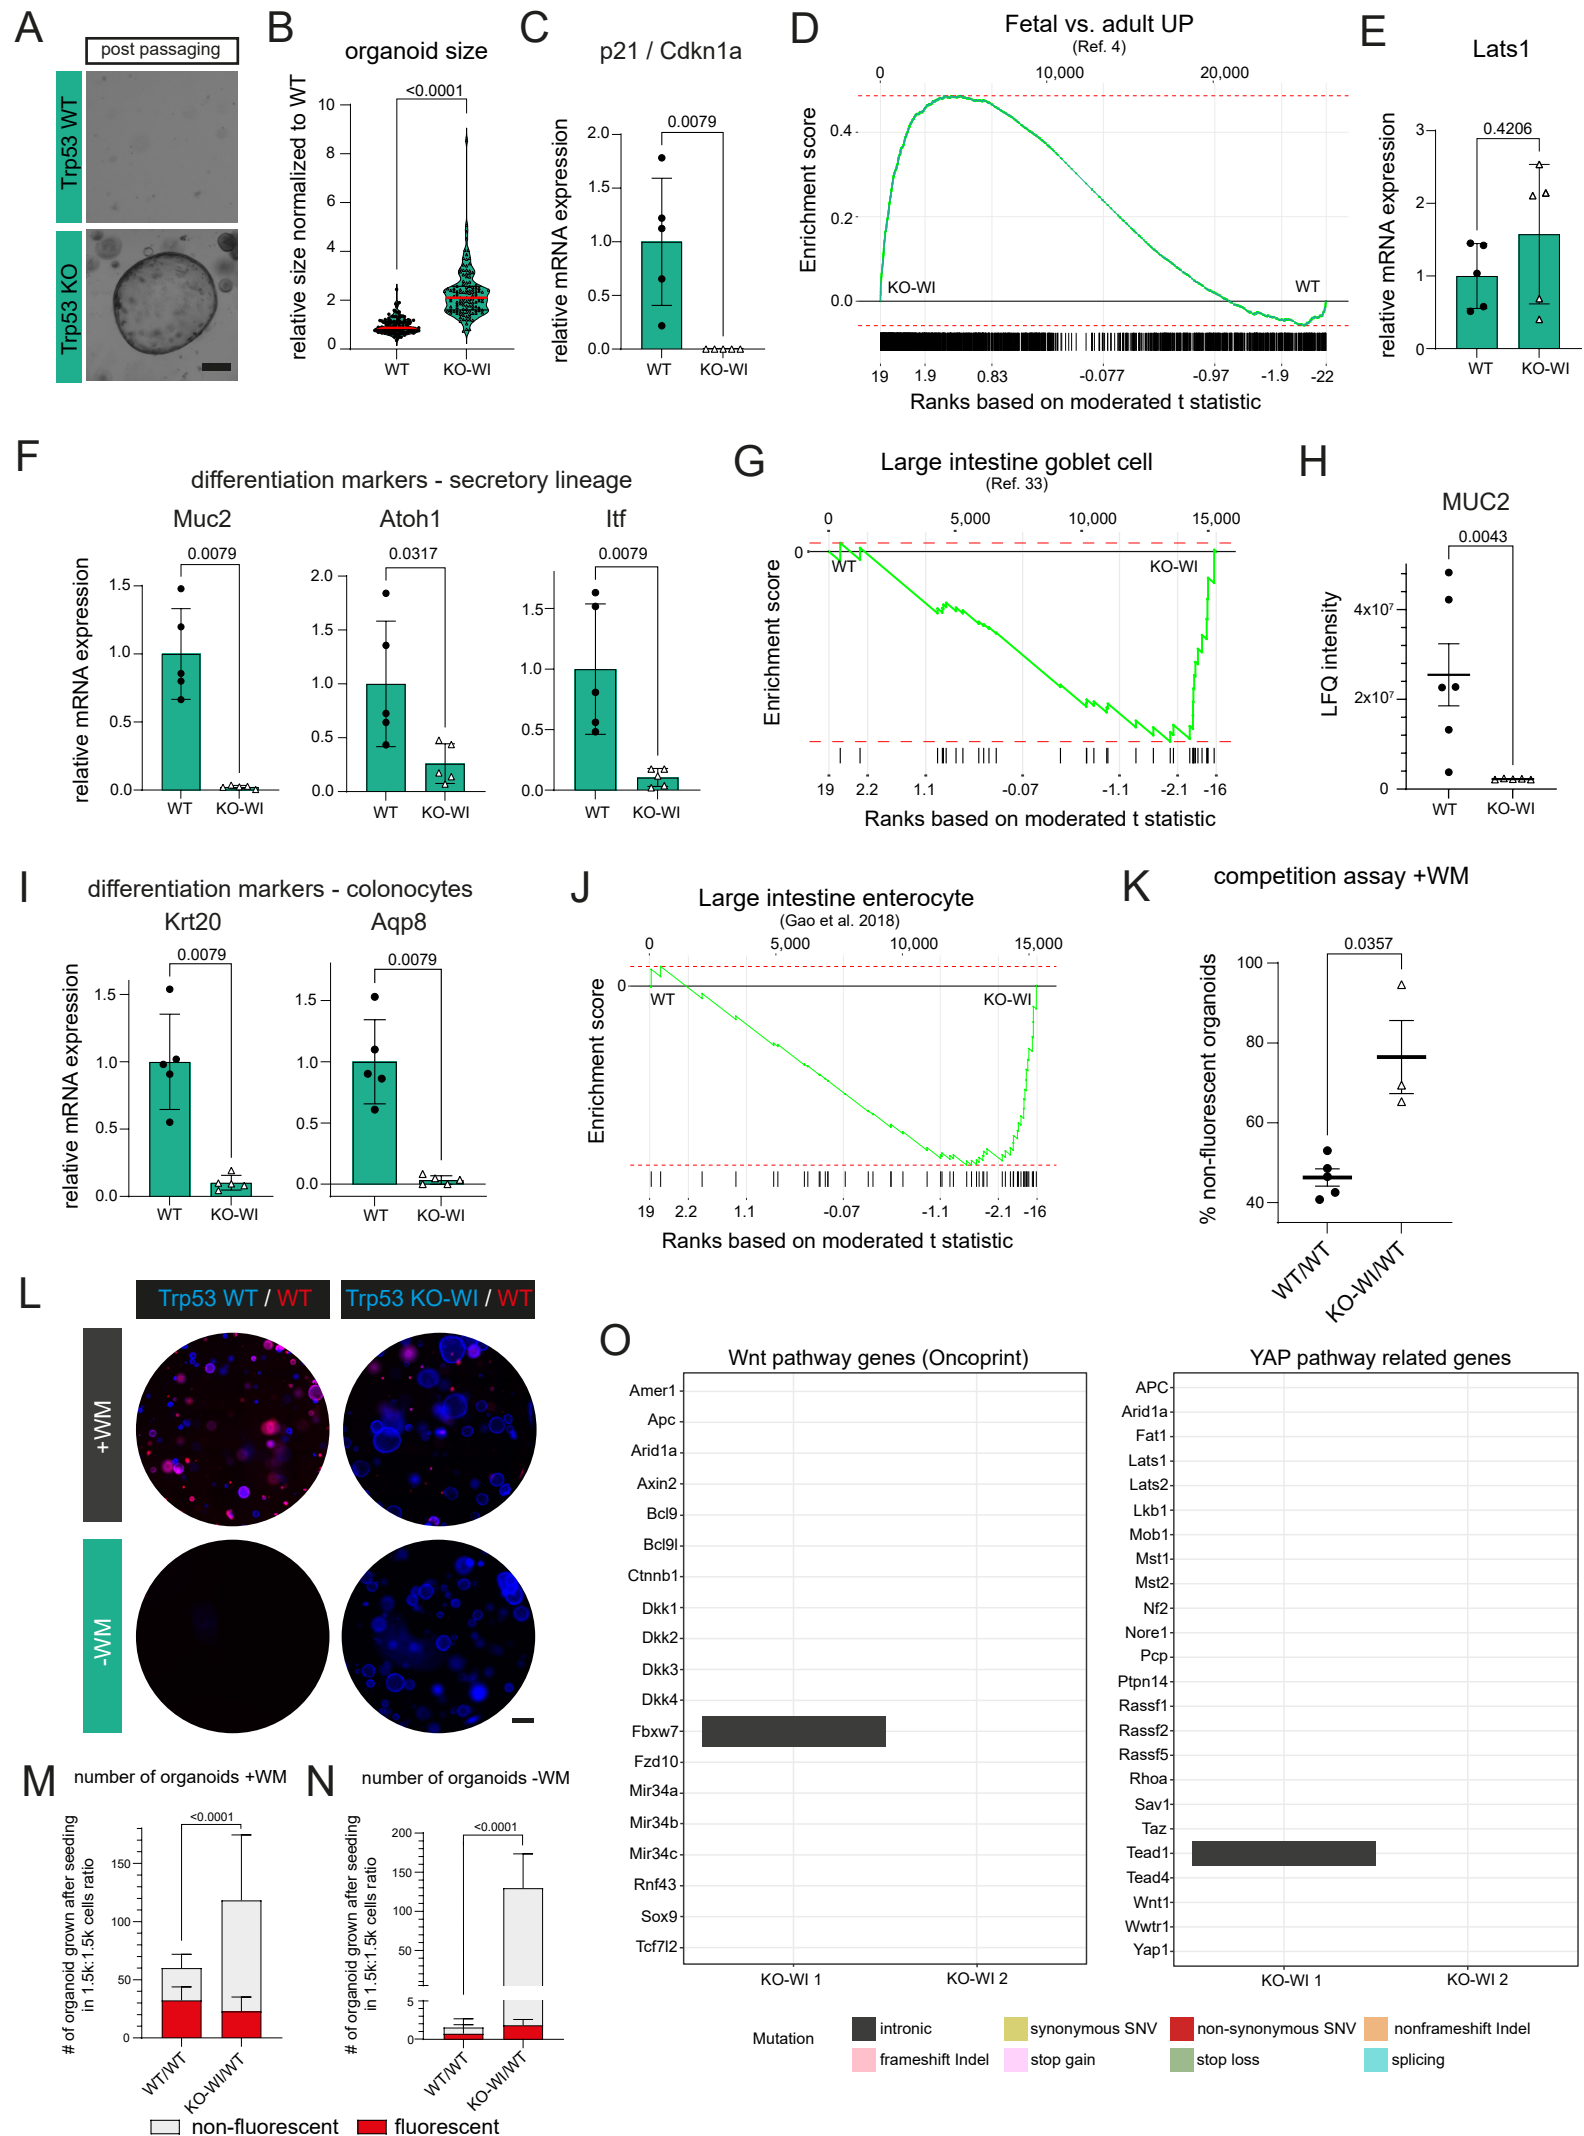

### Supplementary Figure 5: Regenerative *Trp53* KO organoids exhibit accelerated growth kinetics and lack differentiation

**A** Representative BF images of *Trp53* WT and KO organoids cultured in -WM medium.  $n > 6$  biological replicates. Scale bar: 200  $\mu\text{m}$ . **B** Relative size of organoids grown in -WM medium normalized to WT organoids. Median (red line) and quartiles (black lines).  $n = 6$  biological replicates for WT,  $n = 4$  biological replicates for KO-WI. **C** mRNA expression of p21 of *Trp53* WT and KO-WI grown in -WM condition.  $n = 5$  biological replicates. **D** Enrichment plot for KO-WI vs WT organoids in -WM condition for the fetal signature (FDR= 0.022,  $p = 0.00054$ , ES= 0.48, NES= 2.3).  $n = 2$  biological replicates for WT vs  $n = 2$  biological replicates for KO-WI. **E** mRNA expression of Lats1 in *Trp53* WT and KO-WI grown in -WM condition.  $n = 5$  biological replicates. **F** mRNA expression of differentiation markers of the secretory lineage of *Trp53* WT and KO-WI grown in -WM condition.  $n = 4-5$  biological replicates. **G** Enrichment plot for KO-WI vs WT organoids in -WM condition for the large intestinal goblet cell signature (FDR= 0.035,  $p = 0.0012$ , ES= -0.58, NES= -1.9).  $n = 2$  biological replicates for WT vs  $n = 2$  biological replicates for KO-WI. **H** Protein expression for MUC2 in WT and KO-WI organoids in -WM condition.  $n = 3$  biological replicates. **I** mRNA expression of differentiation markers of the colonocyte lineage of *Trp53* WT and KO-WI grown in -WM condition.  $n = 5$  biological replicates. **J** Enrichment plot for KO-WI vs WT organoids in -WM condition for the large intestine enterocyte signature (FDR= 0.018,  $p = 0.00039$ , ES= -0.6, NES= -2.2).  $n = 2$  biological replicates for WT vs  $n = 2$  biological replicates for KO-WI. **K** Representative IF whole-mount images of *Trp53* WT and KO-WI organoids grown in co-culture with fluorescent (red) WT organoids in +WM or -WM medium condition ( $n = 5$  biological replicates for WT,  $n = 3$  biological replicates for KO-WI). All organoids were counterstained with DAPI. Scale bar: 500  $\mu\text{m}$ . **L** Quantification of K in +WM condition ( $n = 5$  biological replicates for WT,  $n = 3$  biological replicates for KO-WI). Plotted as mean  $\pm$  s.e.m. **M** Absolute numbers of organoids grown in +WM condition. Grey: non-fluorescent, red: fluorescent organoids.  $n = 5$  biological replicates for WT,  $n = 3$  biological replicates for KO-WI. **N** Absolute numbers of organoids grown in -WM condition. Grey: non-fluorescent, red: fluorescent organoids.  $n = 5$  biological replicates for WT,  $n = 3$  biological replicates for KO-WI. **O** Mutation data from two KO-WI clones sequenced by whole genome sequencing (WGS) for Wnt pathway- and YAP pathway-related genes.

Fig. S6: Activation of *Trp53* signaling suppresses Wnt targets followed by induction of differentiation

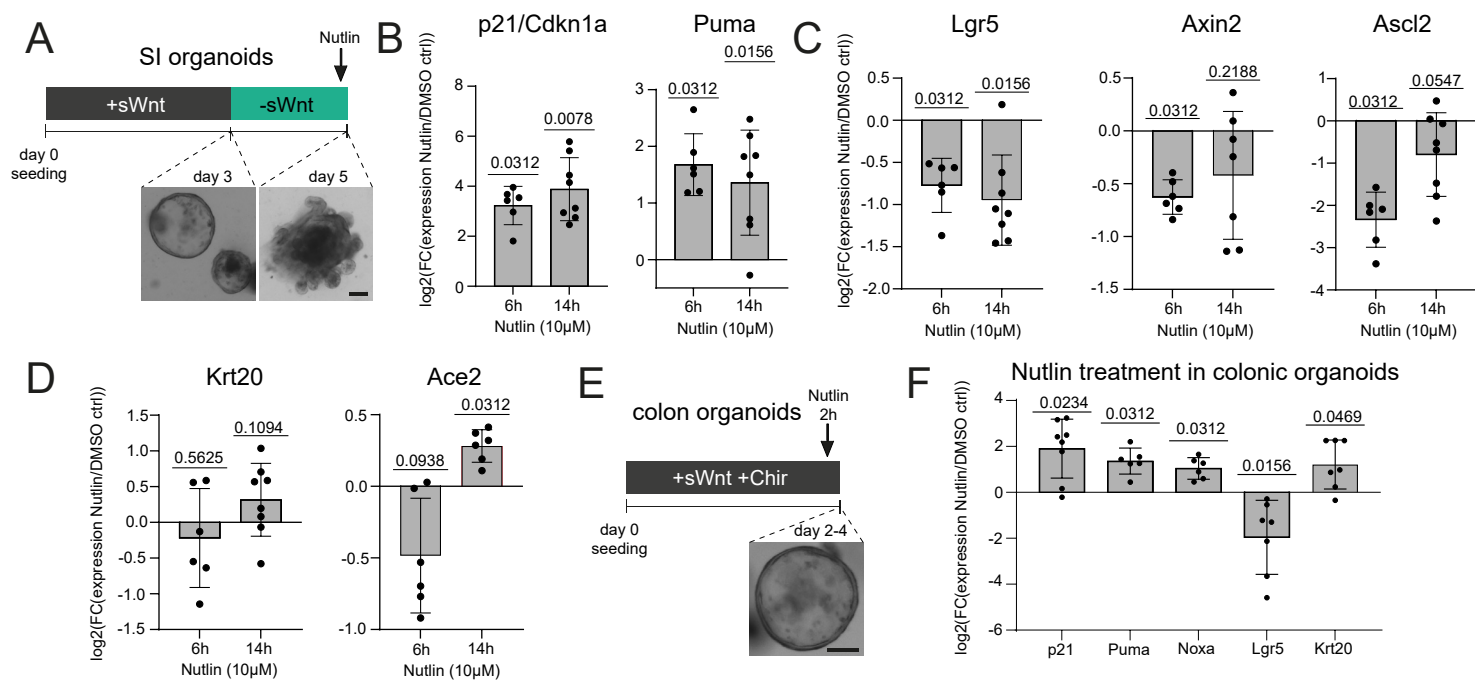

**Supplementary Figure 6: Activation of *Trp53* signaling suppresses Wnt targets followed by induction of differentiation**

**A** Schematic and representative BF images of SI organoids with sWnt supplementation and 10  $\mu$ M Nutlin-3a treatment. **B** mRNA expression of p53 targets 6 h and 14 h after Nutlin induction. n = 6 biological replicates (6h) or n = 9 (14h) experimental replicates from 6 biological replicates. **C** mRNA expression of Wnt targets 6 h and 14 h after Nutlin induction. n = 6 biological replicates (6 h) or n = 9 (14 h) experimental replicates from 6 biological replicates. **D** mRNA expression of differentiation markers 6 h and 14 h after Nutlin induction. n = 7 (6 h) or n = 7-8 (14 h) experimental replicates from 6 biological replicates. **E** Schematic and BF picture of colonic organoids in +WM condition treated with 10  $\mu$ M Nutlin-3a. **F** mRNA expression of p53 targets, stem cell marker *Lgr5* and differentiation marker *Krt20* 2 h after Nutlin induction. n = 6-8 biological replicates. Scale bars: 100  $\mu$ m.

**Supplementary Table 1: Primer sequences**

| <b>ID</b>                              | <b>Sequence (5' to 3')</b> |
|----------------------------------------|----------------------------|
| Genotyping Primer 1 fw                 | AGTCACAGCACATGACGGAG       |
| Genotyping Primer 1 rev                | CACCCGGATAAGATGCTGGG       |
| Genotyping Primer 2 fw                 | CACAAAAACAGGTTAAACCCAG     |
| Genotyping Primer 2 rev                | GAAGACAGAAAAGGGGAGGG       |
| Sanger sequencing Primer betaCat 1 fw  | TTCAGGTAGCATTTTCAGTTCAC    |
| Sanger sequencing Primer betaCat 1 rev | TAGCTTCCAAACACAAATGC       |
| Sanger sequencing Primer betaCat 2 fw  | TGGGTCATTGTCGTAGATGGC      |
| Sanger sequencing Primer betaCat 2 rev | GCTAGCTTCCAAACACAAATGC     |
| Gapdh fw                               | ACCCTTAAGAGGGATGCTGC       |
| Gapdh rev                              | CCCAATACGGCCAAATCCGT       |
| bMgl fw                                | ACGTAACACAGTTCCACCCG       |
| bMgl rev                               | GATCACATGTCTCGATCCAGT      |
| Hprt1 fw                               | TCCCAGCGTCGTGATTAGC        |
| Hprt1 rev                              | TGATGGCCTCCCATCTCCTT       |
| Lgr5 fw                                | CAGTGTGTGCATTTGGGGG        |
| Lgr5 rev                               | CAAGGTCCCGTCATCTTGA        |
| Ascl2 fw                               | TTGGTCCGGTTCTTCATCCG       |
| Ascl2 rev                              | CGTACCAGTCAAGGTGTGCT       |
| Axin2 fw                               | CCTGACCAAACAGACGACGA       |
| Axin2 rev                              | CACCTCTGCTGCCACAAAAC       |
| Sox9 fw                                | CGTGCAGCACAAGAAAGACC       |
| Sox9 rev                               | GGACCCTGAGATTGCCAGA        |
| Cd44 fw                                | GCACGCCATGGACAAGTTTT       |
| Cd44 rev                               | TCTTCTTCAGGAGGGGCTGA       |
| Krt20 fw                               | GTCCACCTCAGCATGAAAGA       |
| Krt20 rev                              | TCTGGCGTTCTGTGTCCTC        |
| Ace2 fw                                | CCTGCTAAGAAACGGAGCCA       |
| Ace2 rev                               | CCAACGATCTCCCGCTTCAT       |
| Aqp8 fw                                | TACCTTGGGGAACATCAGCG       |
| Aqp8 rev                               | TCTGGACTCACCCTTTAGCC       |
| Car4 fw                                | CTGGGCAGCGTCTTTCC          |
| Car 4 rev                              | ATCTCCACTGTGTGTTGATTGTT    |
| Muc2 fw                                | TGTCCTGACCAAGAGCGAAC       |
| Muc2 rev                               | CCTGATTGGGCCTTCCAGGT       |
| Atoh1/Math1 fw                         | GTTGCGCTCACTCACAAATAAGGG   |
| Atoh1/Math1 rev                        | TGGCAGTTGAGTTTCTTCAAGGCG   |
| Itf fw                                 | AGATTACGTTGGCCTGTCTCC      |
| Itf rev                                | ATGTGACAGAGGGGTAGCCA       |
| Ctgf fw                                | AGAACTGTGTACGGAGCGTG       |
| Ctgf rev                               | GTGCACCATCTTTGGCAGTG       |
| Ly6a fw                                | ACCCCTCCCTCTTCAGGATG       |
| Ly6a rev                               | GCTGCACAGATAAAACCTAGCA     |
| Anxa1 fw                               | GGAGAAAGGGGACAGACGTG       |
| Anxa1 rev                              | CTGGTGGCACACTTCACGAT       |
| Ankrd1 fw                              | CAATGCCAAGGACAGAGAAGG      |
| Ankrd1 rev                             | TCAGTTTTCTTGGCCCCAT        |
| Igfbp3 fw                              | CCAGTGCGCGCCTCC            |
| Igfbp3 rev                             | CTCACTGATGTTTCTGGAGCA      |

|                |                         |
|----------------|-------------------------|
| Cyr61 fw       | AAGAGGCTTCCTGTCTTTGGC   |
| Cyr61 rev      | AACTCGTGTGGAGATGCCAG    |
| Cdkn1a/p21 fw  | GGTGGAGACCTGATGATACCC   |
| Cdkn1a/p21 rev | CGAAGAGACAACGGCACACT    |
| Puma fw        | ACGACCTCAACGCGCAGTACG   |
| Puma rev       | GAGGAGTCCCATG AAGAGATTG |
| Noxa fw        | GTGGAGTGCACCGGACATAA    |
| Noxa rev       | CACTCGTCCTTCAAGTCTGCT   |
| Lats1 fw       | AGCAGCACGTAGAGAACGTCC   |
| Lats1 rev      | AATCCAACCCGCATCATTTT    |
| Lats2 fw       | GTACTACCAGAAAGGGAACCAC  |
| Lats2 rev      | ATCACACCGACGCTCCAC      |
| Pkm1/2 fw      | GCGACTCGTCTTCACTTGACT   |
| Pkm1/2 rev     | GCATGGTTCCTGAAGTCCTCG   |

**Supplementary Table 2: Primary Antibodies**

| <b>Antibody</b>         | <b>Manufacturer, details</b>                      | <b>Dilution</b> |
|-------------------------|---------------------------------------------------|-----------------|
| Rabbit anti-KI67        | Cell Signaling Technology, 9129S, clone D3B5      | 1:200           |
| Rabbit anti-keratin 20  | Cell Signaling Technology, 13063S, clone D9Z1Z    | 1:200           |
| Rabbit anti-MUC2        | a gift from Prof. Gunnar C. Hansson               | 1:1000          |
| Rabbit anti-active YAP1 | Abcam, ab205270, clone EPR19812                   | 1:150           |
| Mouse anti-E-cadherin   | BD, 610181, clone 36                              | 1:300           |
| Mouse anti-P53          | Santa Cruz Biotechnology, DO-1, sc-126            | 1:50            |
| Rabbit anti-P21         | Abcam, ab205270, clone EPR19812                   | 1:400           |
| Rat Anti-SCA1/LY6A      | R&D, MAB1226, clone 177228                        | 1:50            |
| Rabbit Anti-Iba1        | Fujifilm Wako Chemicals, 019-19741, batch LEE6425 | 1:200           |
| Rabbit Anti-PKM2        | Cell Signaling Technology, 4053, clone D78A4      | 1:200           |

**Supplementary Table 3: Secondary Antibodies**

| <b>Antibody</b>                       | <b>Manufacturer, details</b>        | <b>Dilution</b> |
|---------------------------------------|-------------------------------------|-----------------|
| AlexaFluor 488 donkey anti-mouse IgG  | Jackson ImmunoResearch, 715-546-150 | 1:300           |
| AlexaFluor 647 donkey anti-rabbit IgG | Jackson ImmunoResearch, 711-605-152 | 1:300           |
| AlexaFluor 488 goat anti-rat IgG      | Jackson ImmunoResearch, 112-546-062 | 1:300           |
| Cy3 goat anti-rabbit IgG              | Jackson ImmunoResearch, 111-165-144 | 1:300           |
| AlexaFluor 647 goat anti-mouse IgG    | Jackson ImmunoResearch, 115-605-008 | 1:300           |

**Supplementary Data 1: Sequence data from Sanger sequencing of KO-WI clones.**
